# Supplementary material for: Development and In Vitro Evaluation of 2-Methoxyestradiol Loaded Polymeric Micelles for Enhancing Anticancer Activities in Prostate Cancer
Source: MDPI journal article supplement (doi:10.3390/polym13060884), 2021-03-13
Supplement: s1 [file s1]

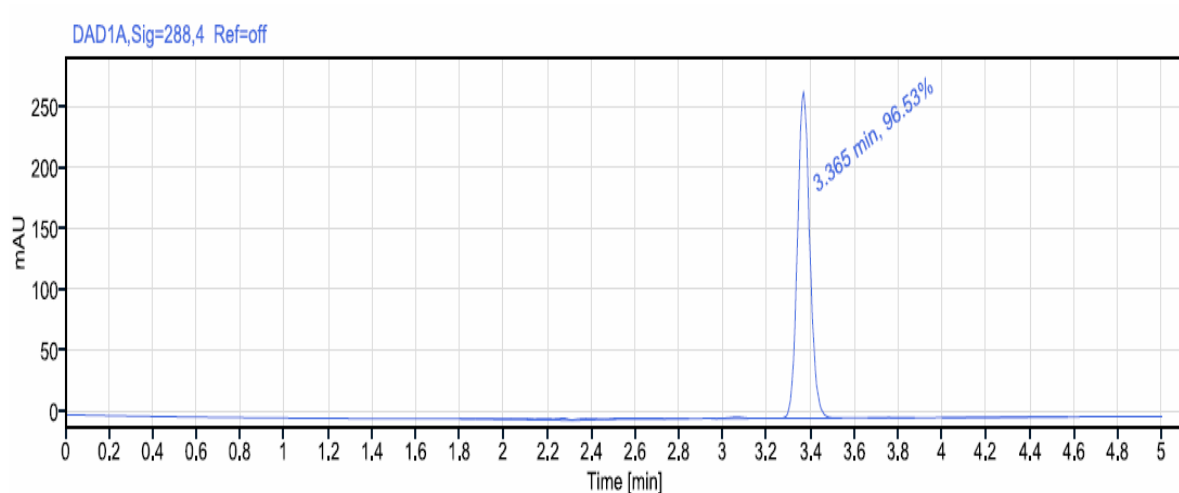

Figure S1. HPLC representative spectra of 2ME.

### Highlights

- The PMs were optimized using a Box-Behnken design with the PL, TW80, and ALA as the independent variables and particle size (PS) as the response.
- The optimized PMs were satisfactory in terms of PS ( $65.36 \pm 2.2$  nm), PDI ( $0.273 \pm 0.03$ ), surface morphology, and entrapment efficiency ( $65.23 \pm 3.5\%$ ).
- The developed 2ME-PMs have been able to provide better cytotoxicity than 2ME alone.
- The formulation of 2ME-PMs could significantly improve the apoptotic activity compared to 2ME alone.
